# Supplementary material for: Yeast One-Hybrid Screening to Identify Transcription Factors for IbMYB1-4 in the Purple-Fleshed Sweet Potato (Ipomoea batatas [L.] Lam.)
Source: MDPI journal article supplement (doi:10.3390/cimb45070364), 2023-07-12
Supplement: s1 [file s1]

**Supplemental Table S1. The primer sets used in this study**

| Name                                | Sequence(5'-3')                                              |
|-------------------------------------|--------------------------------------------------------------|
| <b>Yeast one-hybrid screening</b>   |                                                              |
| pMYB1-1F                            | AAATGATGAATTGAAA <u>AGCTTT</u> ATTGCTCTCAATGTGCAAGAATCA      |
| pMYB1-1R                            | GTCGACAGATCCCCG <u>GGTACCT</u> TGATACGCATACCTTATGCCTAA       |
| pMYB1-2F                            | AAATGATGAATTGAAA <u>AGCTT</u> GTGATTGTTAGTGTGTTGTTGATAGGT    |
| pMYB1-2R                            | GTCGACAGATCCCCG <u>GGTACCT</u> TGAAAAATCCAGTCAACGAAAAA       |
| pMYB1-3F                            | AAATGATGAATTGAAA <u>AGCTT</u> GCGCATCCAAACACTGGAAA           |
| pMYB1-3R                            | GTCGACAGATCCCCG <u>GGTACCA</u> CATGATTGTCATTTTATACAAATCGTATT |
| pMYB1-4F                            | AAATGATGAATTGAAA <u>AGCTTT</u> TATTACATCAAGCTAAATAAATACGATTT |
|                                     | G                                                            |
| pMYB1-4R                            | GTCGACAGATCCCCG <u>GGTACCT</u> ATATATATTGAAGGGTGTCGGAAATTC   |
| pAbAi-F                             | CAAGTTTGTGTTGCTTTTCGTGC                                      |
| pAbAi-R                             | GCTGGAATGATGAATAAAGTGCC                                      |
| <b>Yeast one-hybrid assay</b>       |                                                              |
| ERF1-ADF                            | GCCATGGAGGCCAGTGA <u>ATTTC</u> ATGAATTCAGGATTCTCCTCCGA       |
| ERF1-ADR                            | CAGCTCGAGCTCGATGGATCCTTAAACCAAGGGATTAGGAGTAATTG              |
| PGP19-ADF                           | GCCATGGAGGCCAGTGA <u>ATTTC</u> ATGGCTTCTCTATGGCCGAAC         |
| PGP19-ADR                           | CAGCTCGAGCTCGATGGATCCTAAGAATTGAATTTACAACCTTGCTGTT            |
| PDC-ADF                             | GCCATGGAGGCCAGTGA <u>ATTTC</u> ATGGACACGAAGATTGGATCCA        |
| PDC-ADR                             | CAGCTCGAGCTCGATGGATCCTTACTGTGGGTTTGGTGGCC                    |
| pGADT7-F                            | CGATGATGAAGATACCCCAACAAACC                                   |
| pGADT7-R                            | ACTTGCGGGGTTTTTCAGTATCTACG                                   |
| <b>Yeast two-hybrid (Y2H) assay</b> |                                                              |
| ERF1-BDF                            | ATGGCCATGGAGGCCGA <u>ATTTC</u> ATGAATTCAGGATTCTCCTCCGA       |
| ERF1-BDR                            | CCGCTGCAGGTCGACGGATCCTTAAACCAAGGGATTAGGAGTAATTG              |
| PGP19-BDF                           | ATGGCCATGGAGGCCGA <u>ATTTC</u> ATGGCTTCTCTATGGCCGAAC         |
| PGP19-BDR                           | CCGCTGCAGGTCGACGGATCCTAAGAATTGAATTTACAACCTTGCTGTT            |
| PDC-BDF                             | ATGGCCATGGAGGCCGA <u>ATTTC</u> ATGGACACGAAGATTGGATCCA        |
| PDC-BDR                             | CCGCTGCAGGTCGACGGATCCTTACTGTGGGTTTGGTGGCC                    |
| pGBKT7-F                            | TAATACGACTCACTATAGGGCGA                                      |
| pGBKT7-R                            | GACTCTTAGGTTTTAAAACGAAAA                                     |
| <b>Dual-luciferase assay</b>        |                                                              |
| pM1-4-0800F                         | CTATAGGGCGAATTGG <u>GTACCT</u> TATTACATCAAGCTAAATAAATACGATTT |
|                                     | G                                                            |
| pM1-4-0800R                         | TGTTTTTGGCGTCTTCCATGGTATATATATTGAAGGGTGTCGGAAATTC            |
| p0800-LUC-F                         | CAAGGCGATTAAAGTTGGGTAAC                                      |

|              |                                                     |
|--------------|-----------------------------------------------------|
| p0800-LUC-R  | CTCTCCAGCGGTTCCATCTTCC                              |
| ERF1-62-SKF  | AGGACAGCCCAAGCTGAGCTCATGAATTCAGGATTCTCCTCCGA        |
| ERF1-62-SKR  | GGTACCGGGCCCCCCCCTCGAGTTAAACCAAGGGATTAGGAGTAATTG    |
| PGP19-62-SKF | AGGACAGCCCAAGCTGAGCTCATGGCTTCTCTATGGCCGAAC          |
| PGP19-62-SKR | GGTACCGGGCCCCCCCCTCGAGCTAAGAATTGAATTTACAACCTTGCTGTT |
| PDC-62-SKF   | AGGACAGCCCAAGCTGAGCTCATGGACACGAAGATTGGATCCA         |
| PDC-0800R    | GGTACCGGGCCCCCCCCTCGAGTTACTGTGGGTTTGGTGGCC          |
| p62-SK-F     | CATATAAGGAAGTCATTTTCATT                             |
| p62-SK-R     | TCCCTTATCGGGAAACTACTCA                              |

### Subcellular localization analysis

|               |                                                   |
|---------------|---------------------------------------------------|
| ERF1-1300F    | TTTTCTGATTAACAGGGATCCATGAATTCAGGATTCTCCTCCGA      |
| ERF1-1300R    | GCTCTCGAGACTAGTGGTACCAACCAAGGGATTAGGAGTAATTGATG   |
| PGP19-1300F   | TTTTCTGATTAACAGGGATCCATGGCTTCTCTATGGCCGAAC        |
| PGP19-1300R   | GCTCTCGAGACTAGTGGTACCAGAATTGAATTTACAACCTTGCTGTTCT |
| PDC-1300F     | TTTTCTGATTAACAGGGATCCATGGACACGAAGATTGGATCCA       |
| PDC-1300R     | GCTCTCGAGACTAGTGGTACCCTGTGGGTTTGGTGGCCTG          |
| pCambia1300-F | TACTCTTCGATTTGTGATTTC                             |
| pCambia1300-R | CATCGCAAGACCGGCAACAGG                             |

### Real-time quantitative PCR

|          |                             |
|----------|-----------------------------|
| Q-G14-F  | GTGCGGAAACTGCGACTGC         |
| Q-G14-R  | CGTCCATCTTGCTTCCCTTCCT      |
| Q-MYB1-F | ATGGTTATTTTCATCTGTATGGTCGG  |
| Q-MYB1-R | CTCAAAAGTTGGTCTTCTTCTTCG    |
| Q-ERF1-F | AACGGGATAAGGGTTTGGCTGGG     |
| Q-ERF1-R | CGGACAGTCTCCACGGGGAAGTT     |
| Q-CHS-F  | AAAACCTGAAAACTCCGAGCCACG    |
| Q-CHS-R  | CAAACCCAAACAGCACACCCAC      |
| Q-CHI-F  | GAAGGTGTCGGAAACTGCGTTG      |
| Q-CHI-R  | GGGGTGATTGAGTGAAGAAAATAGAGG |
| Q-F3H-F  | TTCATCGTTTCCAGCCATCTCCA     |
| Q-F3H-R  | TTTTCCGTTACTGCCCTCCACCC     |
| Q-F3'H-F | CTGTGGAGTGGGCATTTCGCAGAA    |
| Q-F3'H-R | AGAGAGTGGGGTGGATGGGTGTAGC   |
| Q-ANS-F  | AATAATGCTAGTGGGCAGCTTGAGTG  |
| Q-ANS-R  | AAGGAGTTTTAGGCCAAATGGAGAGA  |
| Q-DFR-F  | CTGCTGGCTTTATCGGCTCCTGGT    |
| Q-DFR-R  | TGTCAAATTCGTGTCCGCTTTTCG    |

Q-UF3GT-F

GCGTTCCTTGGATTTCTTTTGG

Q-UF3GT-R

TGACATTCCTGGGATTACTTTCAGCT

**Supplemental Table S2. Information of genes interacted with *pIbMYB1-4* by yeast one hybrid screening**

| NO | Gene               | Accession          | Length(     | NO        | Gene               | Accession          | Length(bp) |
|----|--------------------|--------------------|-------------|-----------|--------------------|--------------------|------------|
|    |                    |                    | bp)         |           |                    |                    |            |
| 1  | <i>PLP-3A</i>      | AT3G50960.1        | 1732        | 66        | <i>TRM140A</i>     | AT2G26200.1        | 3982       |
| 2  | <i>IPCS1-3</i>     | AT3G54020.1        | 2639        | 67        | <i>UBQ3</i>        | AT5G03240.1        | 1854       |
| 3  | <i>EMB60</i>       | AT1G01040          | 6276        | 68        | <i>ER1</i>         | AT5G09410.3        | 6594       |
| 4  | <i>RHM1-2</i>      | AT1G78570.1        | 2899        | 69        | <i>NRP1</i>        | AT1G74560.3        | 2466       |
| 5  | <i>AIR12</i>       | AT3G07390.1        | 1196        | 70        | <i>GSR5</i>        | AT5G37600.1        | 2600       |
| 6  | <i>VPS2</i>        | AT2G06530.1        | 2009        | 71        | <i>ATG3</i>        | AT5G61500.1        | 3092       |
| 7  | <i>SORF1</i>       | AT1G10682.1        | 702         | 72        | <i>LYR</i>         | AT5G51960.1        | 1092       |
| 8  | <i>GER5</i>        | AT5G13200.1        | 1506        | <b>73</b> | <b><i>ERF1</i></b> | <b>AT3G23240.1</b> | <b>988</b> |
| 9  | <i>HIS4</i>        | AT2G28740          | 312         | 74        | <i>CBR1</i>        | ATCBR              | 2186       |
| 10 | <i>HAT22</i>       | AT4G37790.1        | 1635        | 75        | <i>MKK4</i>        | AT1G51660.1        | 2016       |
| 11 | <i>VHA-F</i>       | AT4G02620.1        | 2108        | 76        | <i>RTNLB5</i>      | AT4G23630.1        | 3039       |
| 12 | <i>RAN</i>         | AT5G20010.1        | 2237        | 77        | <i>TFIIS</i>       | AT2G32820.1        | 1163       |
| 13 | <i>RPS5B</i>       | AT2G37270.1        | 1795        | 78        | <i>RABA4A</i>      | AT5G65270.1        | 1617       |
| 14 | <i>CNX1</i>        | AT5G61790.1        | 2838        | 79        | <i>CID6</i>        | AT5G25540.1        | 1562       |
| 15 | <i>PFD5</i>        | AT5G23290.1        | 1563        | 80        | <i>U2AF65B</i>     | AT1G60900.1        | 4160       |
| 16 | <i>EDA16</i>       | AT1G61140.1        | 6270        | 81        | <i>SNX2A</i>       | AT5G58440.1        | 3164       |
| 17 | <i>TRM9</i>        | AT4G00770.1        | 2321        | 82        | <i>TPS7</i>        | AT1G06410.1        | 4150       |
| 18 | <i>XTH</i>         | AT1G10550.1        | 933         | 83        | <i>RP</i>          | AT5G16130.1        | 1779       |
| 19 | <i>PS2</i>         | AT1G73010.1        | 1821        | 84        | <i>CAR6</i>        | AT1G70800.1        | 1434       |
| 20 | <i>NDK1</i>        | AT4G09320.1        | 883         | 85        | <i>KHZ2</i>        | AT5G06770.1        | 2299       |
| 21 | <i>OXS3</i>        | AT5G56550.1        | 1119        | 86        | <i>Hsp 70</i>      | AT3G12580.1        | 2770       |
| 22 | <i>PML3</i>        | AT5G36290.1        | 2521        | 87        | <i>IMI</i>         | AT5G62350.1        | 1234       |
| 23 | <i>TRAB</i>        | AT5G45130.1        | 2280        | 88        | <i>GSM1</i>        | AT5G23010.1        | 3805       |
| 24 | <i>AS</i>          | AT2G21390.1        | 4967        | 89        | <i>eIF3</i>        | AT5G37475.1        | 2719       |
| 25 | <b><i>PDC1</i></b> | <b>AT4G33070.1</b> | <b>2547</b> | <b>90</b> | <i>GF14</i>        | AT1G78300.1        | 2250       |
| 26 | <i>ARM</i>         | AT3G20170.1        | 1824        | 91        | <i>PSII</i>        | AT1G34320.1        | 4319       |
| 27 | <i>Zinc</i>        | AT5G25830.1        | 1706        | 92        | <i>L RTPK</i>      | AT4G29990.1        | 4347       |

|    |                 |             |      |     |                                 |                    |             |
|----|-----------------|-------------|------|-----|---------------------------------|--------------------|-------------|
| 28 | <i>TRAF</i>     | AT3G61790.1 | 2137 | 93  | <i>AS2</i>                      | AT1G65620.1        | 2834        |
| 29 | <i>TSS</i>      | AT1G68490.1 | 2802 | 94  | <i>PS2</i>                      | AT1G73010.1        | 1821        |
| 30 | <i>MUM4</i>     | AT1G53500.1 | 2814 | 95  | <i>RRN18</i>                    | ATMG01390.1        | 1935        |
| 31 | <i>APG1</i>     | AT3G63410.1 | 1531 | 96  | <i>LOG3</i>                     | AT2G37210.2        | 2948        |
| 32 | <i>MBOAT</i>    | AT1G57600.1 | 4711 | 97  | <i>RD2</i>                      | AT2G21620.2        | 1684        |
| 33 | <i>WIP</i>      | AT1G08290.1 | 3382 | 98  | <i>CDPK9</i>                    | AT5G23580.1        | 4420        |
| 34 | <i>SNF7</i>     | AT2G06530.1 | 2009 | 99  | <i>PML3</i>                     | AT5G36290.1        | 2521        |
| 35 | <i>OGH17</i>    | AT5G55180.2 | 1933 | 100 | <i>HRQ1</i>                     | AT5G08110.1        | 5412        |
| 36 | <i>DAT</i>      | AT2G03800.1 | 2438 | 101 | <i>HDH1</i>                     | AT4G20930.1        | 2856        |
| 37 | <i>SAP13</i>    | AT3G57480.1 | 2102 | 102 | <i>50A</i>                      | AT1G36980.1        | 2318        |
| 38 | <i>MEB2</i>     | AT5G24290.1 | 2617 | 103 | <i>ATP6</i>                     | ATMG00410.1        | 1321        |
| 39 | <i>GRP4</i>     | AT3G23830.1 | 1869 | 104 | <i>LEA</i>                      | AT5G53730.1        | 1382        |
| 40 | <i>RAB8Rab</i>  | AT3G53610.1 | 2561 | 105 | <i>PG</i>                       | AT2G05171.1        | 958         |
| 41 | <i>NCL-like</i> | AT1G53210.1 | 3407 | 106 | <i>ODB1</i>                     | AT1G71310.2        | 1599        |
| 42 | <i>V-ATP</i>    | AT4G02620.1 | 2108 | 107 | <i>ARA7</i>                     | AT4G19640.1        | 2551        |
| 43 | <i>HERK</i>     | AT3G46290.1 | 3386 | 108 | <i>LNK1</i>                     | AT5G64170.2        | 4358        |
| 44 | <i>WRKY7</i>    | AT4G24240.1 | 2236 | 109 | <i>CD</i>                       | AT2G35795.1        | 1401        |
| 45 | <i>RSZ22</i>    | AT4G31580.1 | 2492 | 110 | <i>MPK8</i>                     | AT1G18150.2        | 3447        |
| 46 | <i>RXF</i>      | AT1G58430.1 | 1610 | 111 | <i>MUG3</i>                     | AT1G06740.1        | 2638        |
| 47 | <i>SAP</i>      | AT5G66840.1 | 2683 | 112 | <i>AHS</i>                      | AT3G23570.1        | 2048        |
| 48 | <i>APA1</i>     | AT1G11910.1 | 4318 | 113 | <i>OPS</i>                      | AT3G09070.1        | 2735        |
| 49 | <i>EMB2296</i>  | AT2G18020.1 | 1410 | 114 | <i>ESD4</i>                     | AT4G15880.1        | 3610        |
| 50 | <i>IF2/IF5</i>  | AT1G77840.1 | 2365 | 115 | <i><math>\alpha</math>1-COP</i> | AT2G21390.1        | 4967        |
| 51 | <i>RAN3</i>     | AT5G55190.1 | 3333 | 116 | <i>MPK18</i>                    | AT1G53510.1        | 4060        |
| 52 | <i>NKS1</i>     | AT4G30996.1 | 1724 | 117 | <i>EF1B</i>                     | AT1G57720.1        | 3060        |
| 53 | <i>SNF2</i>     | AT1G77840.1 | 2365 | 118 | <i>HAT14</i>                    | AT5G06710.1        | 2608        |
| 54 | <i>RPS5B</i>    | AT2G37270.1 | 1795 | 119 | <i>BICE1</i>                    | AT4G05440.1        | 1423        |
| 55 | <i>A20/ANI</i>  | AT1G51200.1 | 2354 | 120 | <i>TRNS.1</i>                   | ATMG00230.1        | 87          |
| 56 | <i>IF6</i>      | AT3G55620.1 | 2499 | 121 | <i>EIF6A</i>                    | AT3G55620.1        | 2499        |
| 57 | <i>PH1</i>      | AT5G05710.1 | 770  | 122 | <i>ARA6</i>                     | AT3G54840.1        | 2695        |
| 58 | <i>ABCI12</i>   | AT3G21580.1 | 2078 | 123 | <i>HMGB3</i>                    | AT1G20696.2        | 2047        |
| 59 | <i>CNX1</i>     | AT5G61790.1 | 2838 | 124 | <i>SNX2B</i>                    | AT5G07120.1        | 2663        |
| 60 | <i>GLR5</i>     | AT1G05200.1 | 3967 | 125 | <i>EP70</i>                     | AT5G37310.1        | 3802        |
| 61 | <i>PFD5</i>     | AT5G23290.1 | 1563 | 126 | <b><i>PGP19</i></b>             | <b>AT3G28860.1</b> | <b>7574</b> |
| 62 | <i>TIF3K1</i>   | AT4G33250.1 | 2158 | 127 | <i>LHP1</i>                     | AT5G17690.2        | 5669        |
| 63 | <i>PRR8</i>     | AT5G17640.1 | 2382 | 128 | <i>PT2</i>                      | AT5G28143.1        | 894         |
| 64 | <i>ASG1</i>     | AT5G17640.1 | 2382 | 129 | <i>ASP1</i>                     | AT2G30970.1        | 3222        |
| 65 | <i>XTH27</i>    | AT2G01850.1 | 2308 | 130 | <i>BPM5</i>                     | AT5G21010.1        | 2751        |

***plbMYB1***

TATTGCTCTCAATGTGCAAGAATCAAATGAAGTATCAATCAGAAGTTTAATTGG  
GACATATTTATTGGTAGCAAATAAAAAACAACTTGTTAACTCTATTACTAAGTC  
AAAAACCTTGTGGTCTAGTGACACCCGATTGCACCCCCACATGGGAAGGGTGA  
GTTTCGAGCTTCAGTAAATGTGATATTGGCTCTATGTGCTTCATTTGGTTGAGAA  
AATAGCTATAAACATATACTACATTGTAATGGAGTCAATAGTTCTCAAAAAAA  
AAAAAAAAGTCTTCGACCGTTTGCCTACTAACCTAGTATTAATGGGAGTTTCTC  
TCATACATTTTATAAAAAATTTAAAAAGAGTAATGCTATTTCTCTCTAAAAAAA  
TTCTTCTCAAAATTTCCCGTAACATTATTTGATTGGCCACTTTTCTTTTTCATTAA  
GGGTCCATCTGAAAAACAGGAAGGATGTGTTTGGTTGGGGGGTTTAGGCATAA  
GGTATGCGTATCAAAGTGATTGTTAGTGTTTGGTTGATAGGTTTTGTGAATGTT  
ACTATGGGTTTGAATACCCCATTAATGGCAAACCCATACCCTTATTAAATAA  
GGGTTTCATCTCCCTTCATCATTTTTTTCCCAATTATTAATAACCATTCCCATT  
CACCCAACCTACCAAACATGCTAAATACTTCCACCAAACCCATTACCCTTACCA  
AGTATTTGATACCCATTCCGATTCCGATTCCGATTCCCACGTGCGAACCAAACG  
CACCCGAAAATGTCTTCTGAAAAATGAGTACAATTGTTTAATTAAACATTTTAA  
TTATTTTATTTAAAATATAAAAAATTATTTATAATAATATTAAAAATATGTTATT  
TATTATTGTTATTATTATTTTTTAAATGATGGTTTCCGACGGAATGGTTTCTGCC  
GAAAACGAGAGCCTAGGTCCAGAAAATGTAAAGATTTTCCCAGTCAATGGAAA  
GTGTTTTTTCGTTGACTGGATTTTTTCAAGCGCATCCAAACACTGGAACTCCGAA  
AATGATTTTTCAGAAAACATTTTTTCGAGTTTTCAAACACCCTAAATGTGTGTTGG  
TGTGTAGTCAGTTAATTCATTGCACCCAATGATTATAAAACATGTCATGCAGAG  
AATTTAAAGAGAGAAAAAATTAGAATGAGTAAGAAGCATTTTTCAATAAATAA  
TTAAATAAATAAAAGATTCCTATGTTATGACAAATTTTTGGGCAATTAAGATAT  
TGCTTAAATTATATAATTTTTACACAATATTATAATACTCATCCAACGGTTCTCG  
ATAGAGGCATACAAGTCGTGCTCTAGATATTTAGAAATATTTGGAGCAAATCC  
AATGATTTGACACAGCAAATATTTGTGTGGCCACAAAATTTTTTTATGCACCT  
CAAAAATTTAATGATGTCTAATATAATGCATTAGTTAATTTCTTACTTATTACAT  
CAAGTTAAATTAATACGATTTGTATAAAATGACAATCATGTTTATTACATCAAG  
CTAAATAAATACGATTTGTATTAAATTAATACAATAATAATAAATCAAGGAC  
AATTTAGTCATTTTCTTTGTTTCTTTTTTCAAGATGCATTAAATTCTAATTTT  
TAGGAGATATATGAATTGCAATTTACAAAATAGAAAAAATTGCAATTCCATCA  
ATTCAAACACCGTAGTTTATAGCTCCGTAAATTGCATTGTAATTGAATTAAAA  
TTTATGTCAACCAATTAACCGAACACCCTCTAAGGGAATCTCTTGTAATCTAAA  
AAAAAATGAATTATCAAAAATTTAAATGTTGTTTGTAAACCTGTCTTATTCACA

AACTTTATGTGATCATACAGAATCTACATAATGATTTTAATAAAAAAAAAAAAA  
AGTTAAGAAAACAAGTGTATTTGAAAAAAAAAAAAAAAAACAAGTGGAAAAC  
ATGTGCAGTGTTCATCATGTAAGTACTCAGTGGTATATATAGTAGCTGTGCTAAC  
TATATTGCAGGGCATACTTATACCAATAATTGGATGCTGCGCTATCTTCTATTAT  
ATTACTCAAGGTCGTTTCTCCATCTTTTCTTCACTTTTTTTTTTCCGGAATTTTGGT  
GCTACCACACCCAAGTAGCCTACCTATACTACAACAACCTTAGCTAAGAATTTC  
CGACACCCTTCAATATATATA

### *IbERF1*

ATGAATTCAGGATTCTCCTCCGATTCATCGCCGGAATATTTCCCGTGGGATTGC  
CGGAATTTGACAGCTCCCTCCCGTTCAACGTTGATGACTCCGAAGAAATGCTC  
CTCTTCGGGGTTCTGTCTCAGGCGGCGGCGGAGAGAACTCCGAGACCAATTCC  
TCGGATTACAGCGTGAAGGAAGAGGAGGTGACCTCGGAGACTCCGAAGAAGG  
AGCAGCGGTCGTTCCGCGGCGTGAGGCGGCGGCCCTGGGGGAAATTCGCGGCG  
GAGATAAGGGATTGACGAGGAACGGGATAAGGGTTTGGCTGGGAACCTTCGA  
CAAAGCAGAGGAGGCGGCTCTGGCCTACGACCAAGCGGCGTTCTCGATGCGGG  
GGCCCATGGCGGTCTTGAACCTCCCCGTGGAGACTGTCCGGGAATCTCTCCGGG  
AAATGAGGTGCCCCGTCGAGGAGGGCGGCTCTCCCGTGGTGGCGCTCAAGCGG  
AGACACTCCTTGCGGCAGCGGGGATTGAACCGGAGGAGCGGCAAACGGCGGG  
AGGTGAAGGTGGAGAATGTGGTGGTGTGTTGAGGACTTGGGTGTTGATTACTTG  
GAACAACTTTTGAGTTCAAGTGGGACTACAACAACATCATCATCATCAATT  
ACTCCTAATCCCTTGGTTTAA

### ***IbPGP19***

ATGGCTTCTCTATGGCCGAACAACCCAATCGCACACAATATACACCAAATCAAATCCACAA  
CCCCAAAACCCCTACCATCAGTTCGTACATTTTCACTTCGATTCTAACCCTAAATACTTGATA  
CCTAACTGTTTCTGCAAATCTATGCTCCCACAATCCTCAAAAATACCTTACATGCCCCGATTA  
TTCAAATCTTTATAAGTAATCGTTTGAATAACCATCAACGATTACAAATCAACAAACCCCTAA  
CCAACAAATCTACGAAATCAAATACAACAAATCACAGATACGAAAACCATCGGAGAAGAA  
AGAAGAATGGCGAGCACAAAGTTATACGAAGTACAATAGCCACAGATAGGACACCTAAAT  
GAGAAGCAATTAGTGAAAAGGTTGGACATTAATGAAAAGGTAGAATGGCAGATTATTTCA  
ATACAAAAAAAAAAAAAAAAAGCTTCCTCCTCCTCCATCTTTCTGTAAACCTCCATTTCTTGA  
ACATACTGTTTCCTTGTTCTTTGCTGCAATCTGTATCATGCAAAAGAGGCTCATGTGTCACGG  
TATTTTAGAGCAATACTAAAAATGGGGGATTTAAGAACTGTCATCCTGCACATAAATGTT  
AGCAAGCACCTCAGTAGATGCAAGAATTGTTGAAGCTAAATATTGCATCTGTATAAACAGG  
AAACTCCTTGCAAGAGTGGCTGAAAAACCTGGCCAGACATGCTGGAACCTGAAGGAAGCTA  
AGAGAACAGCAAGTTGTAAATTCAATTCTTAG

### *IbPDC*

ATG GACACGAAGATTGGATCCATTGACACGTGTAAGCCATTGAACAATGACGTAGGCAACG  
CCCCCTCCACCGGCGCCTTCACCATCCAGAACTCCTCCTTCCACTGCAGCTCCGCCGAGGCC  
ACGCTCGGCCGCCACCTGGCTCGCCGCCTCGTGCAGATAGGGGTGAGTGACGTCTTCGCCG  
TCCCCGGCGACTTCAACCTCACGCTCCTCGACCATCTCATTGACGAGCCCGGGCTCAACCTC  
ATCGGCTGCTGCAACGAGCTCAATGCCGGATACGCCGCCGACGGTTACGCTAGGTCCCCGCG  
GAGTCGGTGCTTGCGCCGTACCTTCACCGTCGGAGGCCTCAGCGTCTCAATGCCATTGCC  
GGCGCTACAGCGAGAACCTCCCTCTCATATGCATTGTTGGCGGCCCCAACTCCAATGACTA  
CGGGACCAACCGGATCCTCCATCACACCATCGGCTTACCCGATTTCACTCAGGAGCTTCGTT  
GCTTTCAAACCGTCACTTGTTATCAGGCCGTGGTGAACAATTTGGAGGATGCGCATGAGTTG  
ATCGATACTGCGATATCAACGTCGTTGAAAGAGAGTAAGCCGGTTTACATAAGCATAAGCT  
GTAACCTGGCAGGGATTCCACATCCTACCTTCAGCCGTGAACCGGTTCCATTTTCGATCAAT  
CCACGATTGAGTAATCAGATGGGGTTGGAAGCGGCGGTGGAAGCGGCGGCAGAGTTTCTG  
AACAAAGGCTGTAAAGCCAGTTATGGTGGGAGGTCCAAAAATGCGCGTTGCAAAAGCCTGC  
AAATCCTTCGTGGAGTTGGCGGATGCTTGTGGCTATGCCGTGGCGGTTATGCCGTCGGCCAA  
GGGGCTAGTTCCCGAACACCACCCTCATTTATCGGAACTTACTGGGGCGCCGTTAGCACGT  
CGTTCTGCGCTGAGATCGTGGAATCCGCCGATGCGTACTTGTTCCGCCGACCTATATTCAAC  
GACTACAGCTCCGTCGGCTACTCCCTGCTTCTGAAGAAGGAGAAGGCGATCATCGTTTCAGC  
CTGATCGCGTGACGATCGGAAACGGACCTGCATTTGGTTGTGTCCTGATGAAGGATTTCTTA  
ACCGCTTTGGCGAAGAGACTCAACTGCAACAAGACTGCTTACGAAAATTACTACAGGATTT  
ATGTTCTGAAGGGAGTCCTGTCAAATGTGAGCCTAAAGAGCCATTAAGGGTGAATGTTCT  
CTTCCAGCACGTTCAGAAAATGCTGTCCGCGCAAACCGCCGTGATTGCTGAGACAGGGGAT  
TCCTGGTTCAATTGCCAGAAGCTGAAACTACCAGAAGGGTGCGGGTATGAGTTCCAAATGC  
AGTATGGCTCAATTGGTTGGTCTGTTGGTTCCACTCTTGGCTATGCTCAAGCTGTTCCCGAG  
AAGCGGGTGATTTCTTCATCGGCGACGGTAGCTTTCAGGTGACCGCTCAGGATGTGTCGA  
CGATGCTGCGATGCGGGCAGAGGAGCATAATCTTCCTCATCAACAATGGTGGCTACACAAT  
CGAAGTTGAAATCCATGATGGACCTTACAACGTAATCAAGAACTGGAATTACACTGCCCTT  
GTTGATGCAATCCACAACGGCCAGGGCAAATGCTGGACAACCAAGGTTTCGTTACGAAGATG  
AGTTAGTTGCAGCAATCGAGACAGCGACAGGAGCAAAGAAAGATTGCCTATGCTTTATTGA  
AGTAATTGCTCACAAGGATGACACGAGCAAAGAATTGCTGGAATGGGGGTCGAGGGTCTCT  
TCAGCCAACAGCAGGCCACCAAACCCACAGTAA
